# Supplementary material for: Perinatal Substance Abuse: At the Clinical Crossroads of Policy and Practice
Source: Atypon-hosted journal article supplement (doi:10.1176/appi.ajp.2015.15081104), 2016-11-01
Supplement: correction.pdf [file correction.pdf]

## Correction Notice

When the article “Perinatal Substance Abuse: At the Clinical Crossroads of Policy and Practice,” by Samuel J. House et al. (doi:10.1176/appi.ajp.2015.15081104) was published in the November 2016 issue, the key in Figure 1 was reversed. In the figure, dark green should indicate “criminal act” and light green “child abuse.” The key was corrected and the article reposted on Nov. 15, 2016, and now appears as intended in the online edition of the November 2016 issue.
